# Supplementary material for: Long non-coding RNA MALAT1 regulates BLCAP mRNA expression through binding to miR-339-5p and promotes poor prognosis in breast cancer
Source: Oxford University Press journal article supplement (doi:10.1042/bsr20181284), 2019-01-25
Supplement: bsr-2018-1284_supp.pdf [file bsr-2018-1284_supp.pdf]

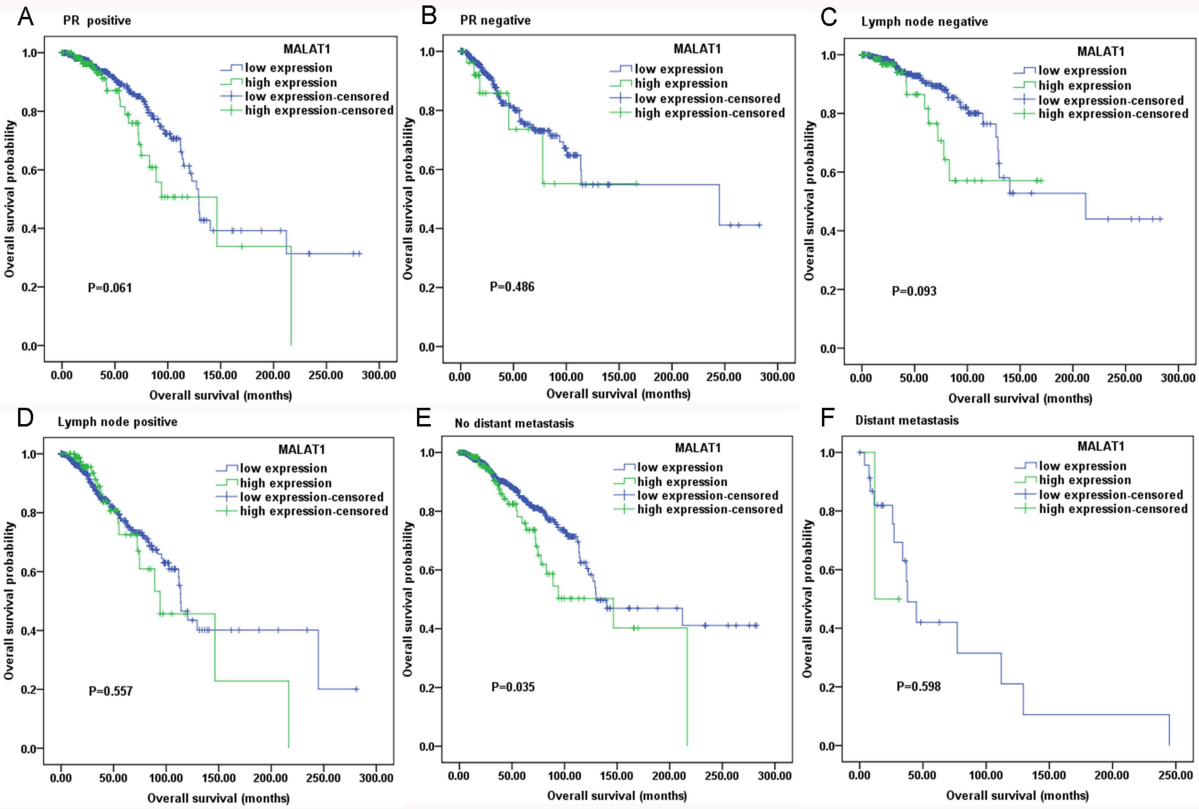

**Table .S1. Primers for construction of recombinant plasmids**

| gene                  | primer | Sequence (5'-3')                     |
|-----------------------|--------|--------------------------------------|
| MALAT1<br>(wild-type) | F      | GCTCTAGAATAGGCATTTGAGTGGCTGAGAGG     |
|                       | R      | ATAAGAATGCGGCCGCGCAGTTATATTAGGTTC    |
| MALAT1<br>(Mutant)    | R1     | GCAGGGATTTGAAGCATCTTTTGCTT           |
|                       | F2     | GCAAAAGATGCTTCAAATCCCTGCGGCG         |
| BLCAP<br>(wild type)  | F      | GCTCTAGAAGACGGGAGGGGAGGCATTGA        |
|                       | R      | CGGGATCCTTGGGACAGTTGAGAAAGGCA        |
| BLCAP<br>(Mutant)     | R1     | TGCAAAAATGAGTTGGACAGGTACTCC          |
|                       | F2     | GTACCTGTCCAACACTCACTTTTGCACCTTATCTCG |

F: forward; R: reverse; R1: reverse primer for mutant 1; R2: forward primer for mutant 2

**Table .S2. Primers for qRT-PCR**

| Gene          | Sequence                   | Base number |
|---------------|----------------------------|-------------|
| MiR-339-5p-RT | GTCGTATCCAGTGCAGGGTCCGAGGT | 50          |
|               | ATTCGCACTGGATACGACCGTGAG   |             |
| MiR-339-5p-FP | CGTCCCTGTCCTCCAGGAG        | 19          |
| MiR-339-5p-RP | AGTGCAGGGTCCGAGGTATT       | 20          |
| MALAT1-FP     | CTCCCCACAAGCAACTTCTC       | 20          |
| MALAT1-RP     | TTCAACCCACCAAAGACCTC       | 20          |
| BLCAP-FP      | GTGAATAATGGCACTGACCG       | 20          |
| BLCAP-RP      | AAGGGAAACCAGAAGAGGGA       | 20          |
| GAPDH-FP      | AACGGATTTGGTCGTATTG        | 19          |
| GAPDH-RP      | GGAAGATGGTGATGGGATT        | 19          |

FP: Forward primer    RP: Reverse primer

**Table .S3. the specific assignment for Clinicopathological parameters and MALAT1, BLCAP expression levels**

| Influencing factors | Assignment instructions                                                        |
|---------------------|--------------------------------------------------------------------------------|
| Age(years)          | Less than 60=0      More than 60=1                                             |
| ER status           | Negative=0      positive=1                                                     |
| PR status           | Negative=0      positive=1                                                     |
| HER2 status         | Negative=0      positive=1                                                     |
| Tumor size (cm)     | ≤ 2=0      > 2=1                                                               |
| **                  |                                                                                |
| Lymph node status   | Negative=0      Positive=1                                                     |
| Distant metastasis  | No=0      Yes=1                                                                |
| Histologic type     | Infiltrating Lobular Carcinoma=1<br>Infiltrating Ductal Carcinoma=2<br>Other=3 |
| MALAT1 expression   | Low expression=0      high expression=1                                        |
| BLCAP expression    | Low expression=0      high expression=1                                        |

ER: estrogen receptor      PR: progesterone receptor      HER2: human epidermal growth factor receptor 2

\*\*Only the size of invasive tumor is included.

**Table .S4. The sequences of miR-339-5p mimics, inhibitor and negative control**

| gene                 | Sequence (5'-3')                                   |
|----------------------|----------------------------------------------------|
| miR-339-5p mimic     | UCCCUGUCCUCCAGGAGCUCACG<br>UGAGCUCCUGGAGGACAGGGAAU |
| Mimic N.C            | UUCUCCGAACGUGUCACGUTT<br>ACGUGACACGUUCGGAGAATT     |
| miR-339-5p inhibitor | CGUGAGCUCCUGGAGGACAGGGA                            |
| Inhibitor N.C        | CAGUACUUUUGUGUAGUACAA                              |
